# Supplementary material for: Effect of Auricularia auricula fermentation broth on the liver and stomach of mice with acute alcoholism
Source: Royal Society of Chemistry journal article supplement (doi:10.1039/d0fo02688c), 2020-11-20
Supplement: d0fo02688c1.pdf [file d0fo02688c1.pdf]

## Supporting information

### Effect of *Auricularia auricula* fermentation broth on liver and stomach in mice with acute alcoholism

Xiaoting Yu <sup>a,b,c,d</sup>, Ruiying Wang <sup>a,b,c,d</sup>, Bin Lai <sup>a,b,c,d</sup> and Mingqian Tan <sup>a,b,c,d\*</sup>

<sup>a</sup> School of Food Science and Technology, Dalian Polytechnic University,  
Dalian 116034, Liaoning, People's Republic of China;

<sup>b</sup> National Engineering Research Center of Seafood, Dalian 116034, Liaoning, People's  
Republic of China;

<sup>c</sup> Engineering Research Center of Seafood of Ministry of Education of China,  
Dalian 116034, Liaoning, People's Republic of China.

<sup>d</sup> Collaborative Innovation Center of Seafood Deep Processing, Dalian Polytechnic  
University, Dalian 116034, Liaoning, People's Republic of China

\*Corresponding authors. Mingqian Tan, Tel: +86-411-86318657, E-mail:  
mqtan@dlpu.edu.cn ORCID: 0000-0002-7535-0035; Qinggongyuan 1, Ganjingzi  
District, Dalian 116034, China

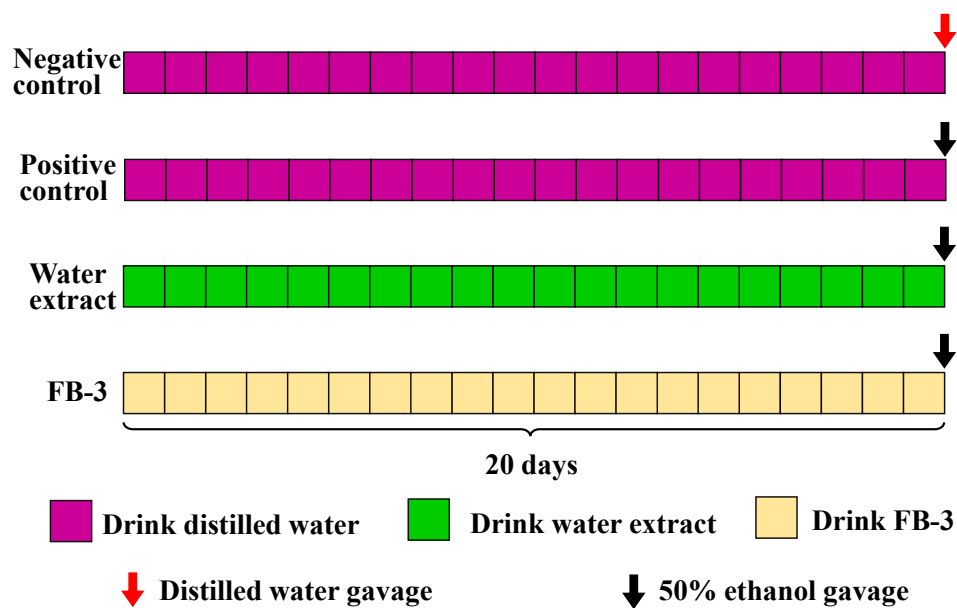

Fig. S1. Experimental design of animals drinking fermentation broth (FB-3, fermentation broth with *B. subtilis*, Lactic acid bacteria and *S. cerevisiae*), water extract (WE) of *A. auricula* for twenty days and the model of acute alcoholism mice was established by 50% ethanol gavage at the twentieth day.

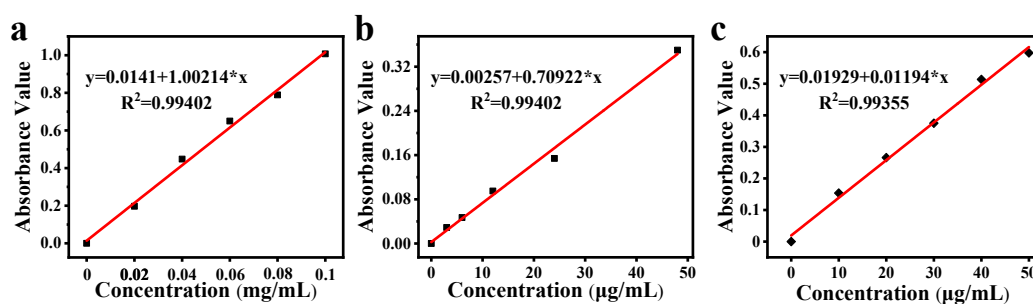

Fig. S2. Standard curves of (a) total sugar, (a) total protein and (a) total phenolic contents of water extract, FB-1 and FB-3 of *A. auricula*.

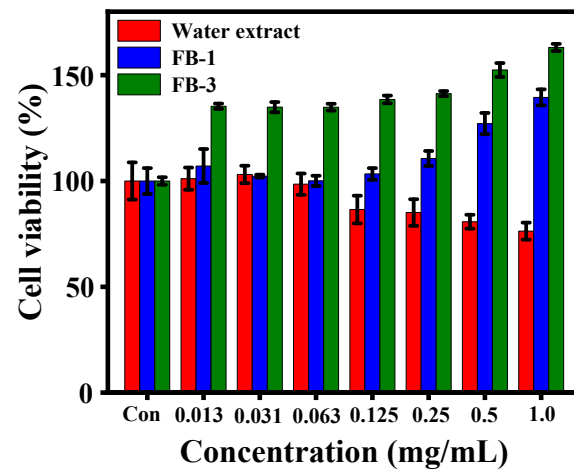

Fig. S3. Cell viability of water extract, FB-1 and FB-3 with increasing concentrations of 0, 0.31, 0.63, 1.25, 2.5, 5.0 and 10.0 mg/mL in NRK cells.
